# Supplementary material
Source: PubMed Central journal article supplement (PMC1087906)

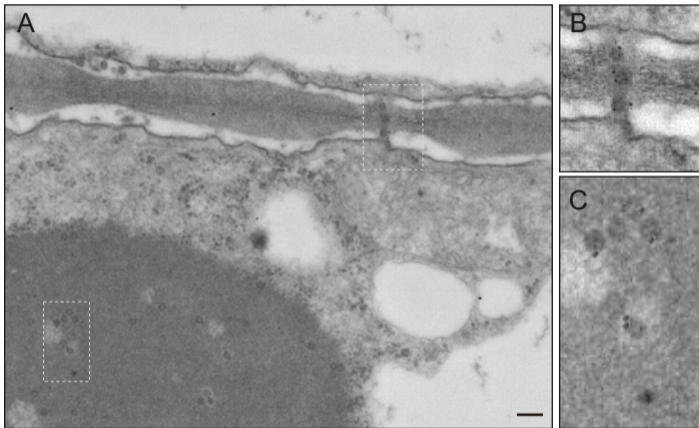

Supplement: pnas_102_17_6219__1.pdf [file pnas_102_17_6219__1.pdf]
